# Supplementary material for: Beyond organic solvents: synthesis of a 5-HT4 receptor agonist in water
Source: Royal Society of Chemistry journal article supplement (doi:10.1039/d0gc03316b), 2020-11-03

## Supplementary Information

### Beyond Organic Solvents: Synthesis of a 5-HT<sub>4</sub> Receptor Agonist in Water

J. Daniel Bailey<sup>\*a</sup>, Edward Helbling<sup>b</sup>, Amey Mankar<sup>b</sup>, Matthew Stirling<sup>a</sup>, Fred Hicks<sup>a</sup>, and David K. Leahy<sup>a</sup>

*<sup>a</sup>Process Chemistry Development, Takeda Pharmaceuticals, 35 Landsdowne St. Cambridge, MA 02139, USA.*

*<sup>b</sup>Work carried out while at Process Chemistry Development, Takeda Pharmaceuticals, 35 Landsdowne St. Cambridge, MA 02139, USA.*

## 1. Contents

|      |                                                                                                                                                                                    |    |
|------|------------------------------------------------------------------------------------------------------------------------------------------------------------------------------------|----|
| 1.   | Contents .....                                                                                                                                                                     | 2  |
| 2.   | General Information .....                                                                                                                                                          | 4  |
| 3.   | Activating Agent Screen for Amide Coupling of Acid 11 and Amine 4.....                                                                                                             | 4  |
| 4.   | Oxidation Condition Screen for Conversion of Alcohol 13 to Aldehyde 14 .....                                                                                                       | 5  |
| 4.1. | Aerobic Oxidation Conditions .....                                                                                                                                                 | 5  |
| 4.2. | Stoichiometric Oxidation Conditions .....                                                                                                                                          | 6  |
| 5.   | Procedures for the Synthesis of TAK-954 .....                                                                                                                                      | 7  |
| 5.1. | 2-Isopropyl-1H-benzo[d]imidazole-4-carboxylic acid ( <b>11</b> ) .....                                                                                                             | 7  |
| 5.2. | Tert-butyl 4-((2-isopropyl-1H-benzo[d]imidazole-4-carboxamido) methyl) piperidine-1-carboxylate ( <b>5</b> ) ..                                                                    | 8  |
| 5.3. | 2-isopropyl-N-(piperidin-4-ylmethyl)-1H-benzo[d]imidazole-4-carboxamide ( <b>6</b> ).....                                                                                          | 9  |
| 5.4. | sodium hydroxy(1-(methoxycarbonyl)piperidin-4-yl)methanesulfonate ( <b>16</b> ) .....                                                                                              | 10 |
| 5.5. | methyl 4-((4-((2-isopropyl-1H-benzo[d]imidazole-4-carboxamido) methyl)piperidin-1-yl)methyl)piperidine-1-carboxylate hydrate ( <b>TAK-954 Hydrate</b> ) .....                      | 10 |
| 5.6. | Recrystallization of methyl 4-((4-((2-isopropyl-1H-benzo[d]imidazole-4-carboxamido) methyl)piperidin-1-yl)methyl)piperidine-1-carboxylate hydrate ( <b>TAK-954 Hydrate</b> ) ..... | 11 |
| 6.   | Process Mass Intensity (PMI) Calculations .....                                                                                                                                    | 11 |
| 6.1. | Preparation of Benzimidazole <b>11</b> .....                                                                                                                                       | 11 |
| 6.2. | Preparation of Amide <b>5</b> .....                                                                                                                                                | 12 |
| 6.3. | Preparation of Aldehyde-Bisulfite Adduct <b>16</b> .....                                                                                                                           | 12 |
| 6.4. | Preparation of Amine <b>6</b> .....                                                                                                                                                | 13 |
| 6.5. | Preparation of <b>TAK-954 Hydrate</b> .....                                                                                                                                        | 13 |
| 6.6. | Preparation of <b>TAK-954</b> .....                                                                                                                                                | 14 |
| 6.7. | Calculation of Cumulative PMI.....                                                                                                                                                 | 14 |
| 7.   | Compound Characterization Data .....                                                                                                                                               | 15 |
| 7.1. | [ <b>11</b> ] 2-isopropyl-1H-benzo[d]imidazole-4-carboxylic acid .....                                                                                                             | 15 |
| 7.2. | [ <b>5</b> ] tert-butyl 4-((2-isopropyl-1H-benzo[d]imidazole-4-carboxamido) methyl)piperidine-1-carboxylate:..                                                                     | 15 |
| 7.3. | [ <b>6</b> ] 2-isopropyl-N-(piperidin-4-ylmethyl)-1H-benzo[d]imidazole-4-carboxamide .....                                                                                         | 16 |
| 7.4. | [ <b>16</b> ] sodium hydroxy(1-(methoxycarbonyl)piperidin-4-yl)methanesulfonate .....                                                                                              | 16 |
| 7.5. | [ <b>TAK-954</b> ] methyl 4-((4-((2-isopropyl-1H-benzo[d]imidazole-4-carboxamido)methyl)piperidin-1-yl)methyl)piperidine-1-carboxylate .....                                       | 17 |
| 8.   | NMR Spectra .....                                                                                                                                                                  | 19 |
| 8.1. | 2-isopropyl-1H-benzo[d]imidazole-4-carboxylic acid .....                                                                                                                           | 19 |
| 8.2. | tert-butyl 4-((2-isopropyl-1H-benzo[d]imidazole-4-carboxamido) methyl) piperidine-1-carboxylate .....                                                                              | 21 |
| 8.3. | 2-isopropyl-N-(piperidin-4-ylmethyl)-1H-benzo[d]imidazole-4-carboxamide .....                                                                                                      | 23 |

|      |                                                                                                                           |    |
|------|---------------------------------------------------------------------------------------------------------------------------|----|
| 8.4. | sodium hydroxy(1-(methoxycarbonyl)piperidin-4-yl)methanesulfonate .....                                                   | 25 |
| 8.5. | methyl 4-((4-((2-isopropyl-1H-benzo[d]imidazole-4-carboxamido)methyl)piperidin-1-yl)methyl)piperidine-1-carboxylate ..... | 27 |

## 2. General Information

Reagents were purchased from Millipore-Sigma, Acros Organics, Chem-impex int'l INC, Asta Tech, Chemrio, Combi-Blocks, and PHT. 2,3-diaminobenzoic acid starting material purchased from Combi-Blocks required purification via charcoal filtration before use. All other reagents were used without further purification. TPGS-750-M was purchased from PHT and Millipore-Sigma as a wax and the desired 2 wt. % aqueous solution was prepared using de-ionized water.  $^1\text{H}$  and  $^{13}\text{C}$  NMR spectra were recorded on a 400 MHz Bruker Avance III spectrometer (Bruker BioSpin Corporation [Billerica, MA, USA]) equipped with a 5.0 mm BBO probe. Proton spectra were acquired with excitation sculpting to suppress the water signal. HSQC and HMBC data were acquired using a non-uniform sampling (NUS) protocol. Data was processed by MNova V 14.0 (Mestrelab Research [Santiago de Compostela, Spain]). DMSO- $d_6$ ,  $\text{CDCl}_3$ , and  $\text{D}_2\text{O}$  were used as solvent; Residual peaks for  $(\text{CH}_3)_2\text{SO}$  in  $(\text{CD}_3)_2\text{SO}$  ( $^1\text{H}$  = 2.50 ppm,  $^{13}\text{C}$  = 39.52 ppm) and  $\text{CDCl}_3$  ( $^1\text{H}$  = 7.26 ppm,  $^{13}\text{C}$  = 77.20 ppm) have been assigned. The chemical shifts are reported in ppm, the coupling constant  $J$  values are given in Hz. The peak patterns are indicated as follows: brs, broad singlet; s, singlet; d, doublet; t, triplet; q, quartet; p, pentet; m, multiplet. IR spectra were recorded on a Nicolet iS10 FTIR spectrometer.

## 3. Activating Agent Screen for Amide Coupling of Acid 11 and Amine 4

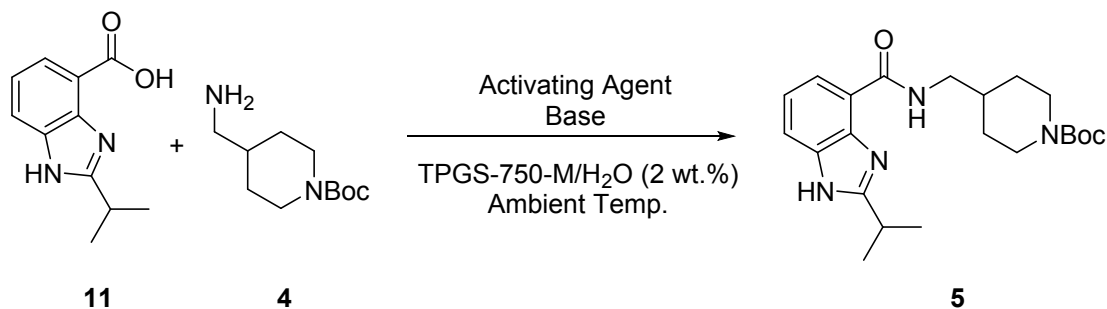

General Procedure:

2-isopropyl-1H-benzo[d]imidazole-4-carboxylic acid **11** (250 mg, 1.2 mmol) and tert-butyl 4-(aminomethyl)piperidine-1-carboxylate **4** (257 mg, 1.2 mmol) were placed in a 4 mL vial. 2 wt. % TPGS-750-M in water (2.5 mL) and the indicated base were added followed by the indicated activating agent. The reaction mixture was stirred at the indicated temperature for 24 hours. A sample of the reaction mixture was then analyzed for conversion by HPLC.

| Entry | Activating Agent (amount)    | Base (amount)                         | Temperature | Conversion (HPLC area %) |
|-------|------------------------------|---------------------------------------|-------------|--------------------------|
| 1     | DMTMM (3.0 equiv)            | 4-methylmorpholine (3.0 equiv)        | Ambient     | 97                       |
| 2     | DIC (1.0 equiv)              | None                                  | Ambient     | 23                       |
| 3     | TNTU (1.5 equiv)             | N,N-diisopropylethylamine (2.0 equiv) | 40 °C       | 16                       |
| 4     | EDCI (1.5 equiv), HOBt (1.2) | 4-Methylmorpholine                    | Ambient     | 34                       |

|                |                                    |                                          |         |     |
|----------------|------------------------------------|------------------------------------------|---------|-----|
|                | equiv)                             | (3.0 equiv)                              |         |     |
| 5 <sup>a</sup> | Thionyl chloride (7 equiv)         | K <sub>2</sub> CO <sub>3</sub> (8 equiv) | 50 °C   | 59  |
| 6              | Cyanuric chloride (1.0 equiv)      | 4-Methylmorpholine (1.0 equiv)           | Ambient | 19  |
| 7              | Isobutyl chloroformate (1.3 equiv) | 4-Methylmorpholine (1.4 equiv)           | Ambient | 30  |
| 8              | EEDQ                               | None                                     | Ambient | 22  |
| 9              | TCFH (1.5 equiv)                   | 1-Methylimidazole (3.0 equiv)            | Ambient | >98 |

<sup>a</sup> The acid chloride of **11** was pre-formed in neat thionyl chloride before addition to an aqueous solution of **4** and K<sub>2</sub>CO<sub>3</sub>.

#### Activating Agent Abbreviations:

- DIC: *N,N'*-Diisopropylcarbodiimide
- DMTMM: 4-(4,6-Dimethoxy-1,3,5-triazin-2-yl)-4-methylmorpholinium chloride
- EDCI: 1-Ethyl-3-(3-dimethylaminopropyl)carbodiimide
- EEDQ: *N*-Ethoxycarbonyl-2-ethoxy-1,2-dihydroquinoline
- HOBt: 1-Hydroxybenzotriazole
- TCFH: Chloro-*N,N,N',N'*-tetramethylformamidinium hexafluorophosphate
- TNTU: *O*-(5-Norbornene-2,3-dicarboximido)-*N,N,N',N'*-tetramethyluronium tetrafluoroborate

## 4. Oxidation Condition Screen for Conversion of Alcohol **13** to Aldehyde **14**

### 4.1. Aerobic Oxidation Conditions

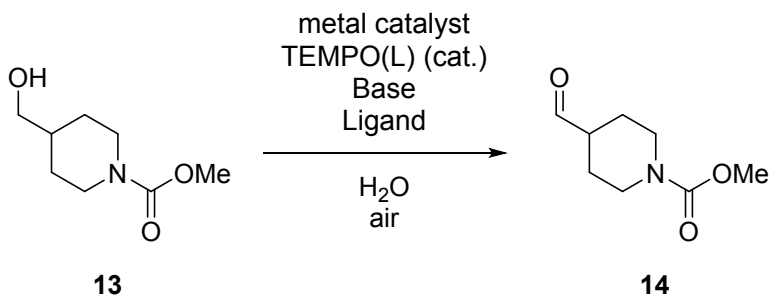

#### General Procedure:

Methyl 4-(hydroxymethyl)piperidine-1-carboxylate **13** (100 mg, 0.58 mmol) was added to a 4 mL vial with magnetic stir bar. Water (1.00 mL) was added and all solids dissolved. The indicated metal catalyst, TEMPO or TEMPOL, ligand, base, and any other additives were added to the reaction mixture. The mixture was stirred open to air at the indicated temperature for approximately 24 hours. The mixture was then extracted three times with dichloromethane (3 x 1

mL). The combined organic layer was washed successively with aqueous sodium bicarbonate and brine. The organic layer was then dried over sodium sulfate, concentrated to dryness via rotary evaporator, and analyzed for reaction conversion by  $^1\text{H}$  NMR in  $\text{D}_2\text{O}$ .

| Entry          | Metal Catalyst (amount)                                             | Catalyst (amount)                          | Base (amount)                | Ligand (amount)            | Reaction Temp. | Conversion to Aldehyde <b>14</b> <sup>a</sup> |
|----------------|---------------------------------------------------------------------|--------------------------------------------|------------------------------|----------------------------|----------------|-----------------------------------------------|
| 1 <sup>1</sup> | $\text{Fe}(\text{NO}_3)_3 \cdot 9\text{H}_2\text{O}$ (5 mol %)      | TEMPOL (10 mol %), NaCl (10 mol %)         | None                         | None                       | Ambient        | None Detected                                 |
| 2 <sup>2</sup> | CuBr (5 mol %)                                                      | TEMPO (5 mol %)                            | 1-Methylimidazole (10 mol %) | 2,2'-Bipyridine (5 mol %)  | 50 °C          | None Detected                                 |
| 3 <sup>2</sup> | $\text{CuBr}_2$ (5 mol %)                                           | TEMPO (5 mol %)                            | 1-Methylimidazole (10 mol %) | 2,2'-Bipyridine (5 mol %)  | 50 °C          | None Detected                                 |
| 4 <sup>3</sup> | $\text{FeCl}_3$ (5 mol %)                                           | TEMPO (5 mol %), $\text{NaNO}_2$ (8 mol %) | None                         | None                       | 50 °C          | None Detected                                 |
| 5 <sup>4</sup> | $\text{Cu}(\text{NCCH}_3)_4 \cdot \text{CF}_3\text{SO}_3$ (5 mol %) | TEMPO (5 mol %)                            | 1-Methylimidazole (10 mol %) | 2,2'-Bipyridine (5 mol %)  | Ambient        | None Detected                                 |
| 6              | CuI (5 mol %)                                                       | TEMPO (10 mol %)                           | 1-Methylimidazole (20 mol %) | 2,2'-Bipyridine (10 mol %) | 50 °C          | Trace                                         |

<sup>a</sup> Determined from peak ratios in  $^1\text{H}$  NMR of crude product mixture.

#### Abbreviations:

- TEMPO: 2,2,6,6-Tetramethylpiperidine 1-oxyl
- TEMPOL: 4-Hydroxy-2,2,6,6-tetramethylpiperidine 1-oxyl

#### References:

1. X. Jiang, J. Liu, S. Ma *Org. Process Res. Dev.* 2019, **23**, 825
2. J.M. Hoover, S. S. Stahl, *J. Am. Chem. Soc.* 2011, **133**, 16901
3. W. Yin, C. Chu, Q. Lu, J. Tao, X. Liang, R. Liu, *Adv. Synth. Catal.* 2010, **352**, 113
4. J. M. Hoover, J. E. Steves, S. S. Stahl *Nat. Protoc.* 2012, **7**, 1161

#### 4.2. Stoichiometric Oxidation Conditions

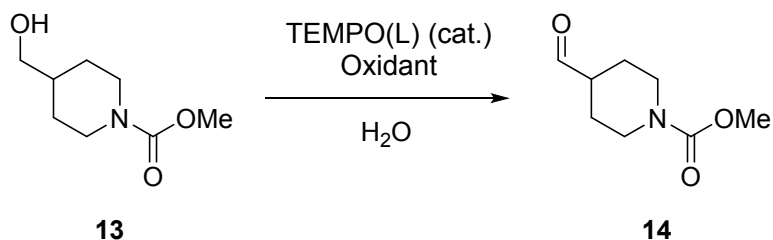

#### General Procedure:

Methyl 4-(hydroxymethyl)piperidine-1-carboxylate **13** (100 mg, 0.57733 mmol) was added to a 4 mL vial with magnetic stir bar. Water (1.00 mL) was added and all solids dissolved. TEMPO or TEMPOL, stoichiometric oxidant, and any other additives were added to the reaction mixture. The mixture was stirred at ambient temperature for approximately 24 hours. The mixture was then extracted three times with dichloromethane (3 x 1 mL). The combined organic layer was washed successively with aqueous sodium bicarbonate and brine. The organic layer was then dried over sodium sulfate, concentrated to dryness via rotary evaporator, and analyzed for reaction conversion by <sup>1</sup>H NMR in D<sub>2</sub>O.

| Entry | Catalyst (Amount)                                             | Surfactant (Amount) | Co-Solvent (Amount) | Oxidant                            | Conversion (%) <sup>a</sup> | Overoxidation to Acid (%) <sup>a</sup> |
|-------|---------------------------------------------------------------|---------------------|---------------------|------------------------------------|-----------------------------|----------------------------------------|
| 1     | TEMPO (5 mol %), NaHCO <sub>3</sub> (7 mol %), NaBr (5 mol %) | None                | None                | NaOCl (1.5 equiv)                  | 30                          | 30                                     |
| 2     | TEMPO (5 mol %)                                               | None                | None                | (Diacetoxyiodo)benzene (1.1 equiv) | 11                          | None Detected                          |
| 3     | TEMPO (5 mol %)                                               | TPGS-750-M (2 wt%)  | None                | (Diacetoxyiodo)benzene (1.1 equiv) | 40                          | None Detected                          |
| 4     | TEMPOL (5 mol %)                                              | TPGS-750-M (2 wt%)  | None                | (Diacetoxyiodo)benzene (1.1 equiv) | 50                          | None Detected                          |
| 5     | TEMPO (5 mol %)                                               | TPGS-750-M (2 wt%)  | THF (15% v/v)       | (Diacetoxyiodo)benzene (1.1 equiv) | 70                          | None Detected                          |
| 6     | TEMPOL (5 mol %)                                              | TPGS-750-M (2 wt%)  | THF (15% v/v)       | (Diacetoxyiodo)benzene (1.1 equiv) | 70                          | None Detected                          |

<sup>a</sup> Determined from peak ratios in <sup>1</sup>H NMR of crude product mixture.

## 5. Procedures for the Synthesis of TAK-954

### 5.1. 2-Isopropyl-1H-benzo[d]imidazole-4-carboxylic acid (**11**)

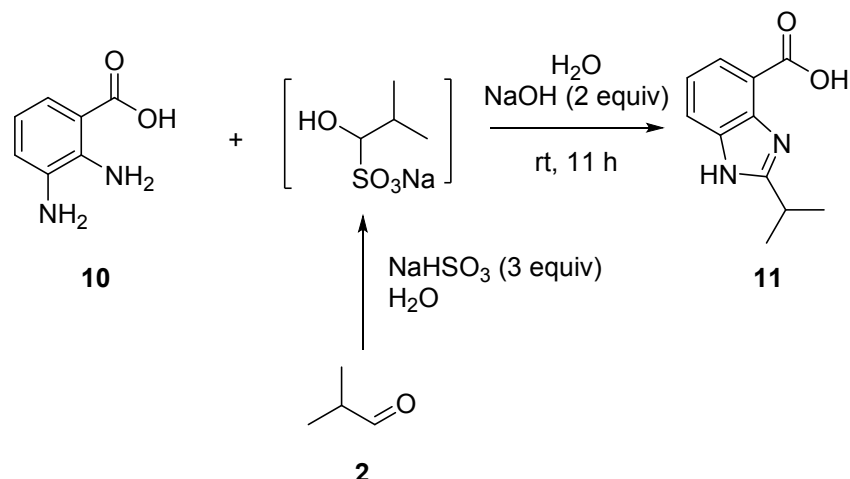

*Preparation of Aldehyde-Bisulfite Adduct Solution:*

2-Methylpropanal **2** (47.4 g, 657 mmol, 1.25 equiv) was dissolved in H<sub>2</sub>O (875 mL). NaHSO<sub>3</sub> (164 g, 1.58 mol, 3.00 equiv) was added and the resulting solution was stirred at ambient temperature for 1 hr. A sample of the solution was then removed, diluted with D<sub>2</sub>O, and analyzed by <sup>1</sup>H NMR, which showed that no aldehyde was present.

*Cyclization:*

2,3-Diaminobenzoic acid **10** (100 g, 526 mmol, 80 mass % potency, 1.00 equiv) was charged to a separate reaction vessel. Water (500 ml) and NaOH (4M in water, 263 mL, 2.00 equiv) were charged to the vessel. Agitation was initiated at ambient temperature and all solids dissolved. The previously prepared solution of isobutyraldehyde-bisulfite adduct was added to the reaction vessel over 2 hours via peristaltic pump while maintaining an internal temperature between 15 °C and 25 °C. The reaction solution was stirred at 15-25 °C for 11 hours. A sample of the reaction mixture was then removed and analyzed by HPLC, which indicated complete consumption of 2,3-diaminobenzoic acid starting material.

*Crystallization:*

HCl (1.50 eq, 4M in water) was added over 2 hours via peristaltic pump to adjust the pH of the product mixture to approximately 5. A thick slurry formed during HCl addition and was left to stir at room temperature for 12 hours to equilibrate. The slurry was then filtered. Water at pH 5 (2 x 100 mL) was used to rinse the reaction vessel and was then transferred to the filter to wash the filter cake. The filter cake was washed a second time with MeCN (100 mL x 2). The filter cake was deliquored and dried in a vacuum oven at 45 °C for 12 hours. Benzimidazole **11** was obtained as an off-white, crystalline solid (100 g, 79% assay corrected yield, 85% potency).

*5.2. Tert-butyl 4-((2-isopropyl-1H-benzo[d]imidazole-4-carboxamido) methyl) piperidine-1-carboxylate (**5**)*



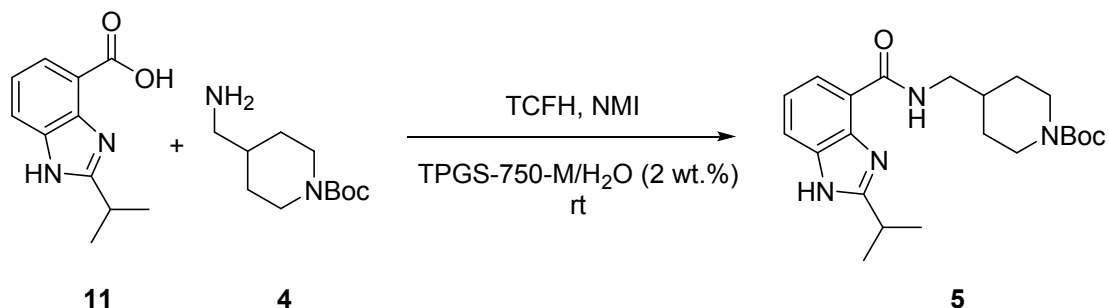

2-Isopropyl-1H-benzimidazole-4-carboxylic acid **11** (90 g, 397 mmol, 90% purity, 1.00 equiv) and tert-butyl 4-(aminomethyl)piperidine-1-carboxylate **4** (111 g, 516 mmol, 1.30 equiv) were charged to a reaction vessel. Water (760 mL), tetrahydrofuran (135 mL), and N-methylimidazole (114 g, 1.39 mol, 3.50 equiv) were charged to the reaction vessel sequentially. Agitation was initiated and all solids dissolved. Chloro-*N,N,N',N'*-tetramethylformamidium hexafluorophosphate (166.8 g, 594 mmol, 1.50 equiv) was added in three equal portions (55.6 g, 198 mmol, 0.50 equiv each), waiting 15 minutes between each addition. The resulting slurry was stirred at ambient temperature for 11 hours. A sample of the reaction mixture was then removed and analyzed by HPLC, which indicated complete consumption of carboxylic acid starting material **11**. The slurry was filtered, washed with water (200 mL), and dried in a vacuum oven at 45°C for 12 hours. Amide **5** was obtained as an off-white, crystalline solid (169 g, 91% assay corrected yield, 95% potency).

### 5.3. 2-isopropyl-N-(piperidin-4-ylmethyl)-1H-benzo[d]imidazole-4-carboxamide (**6**)

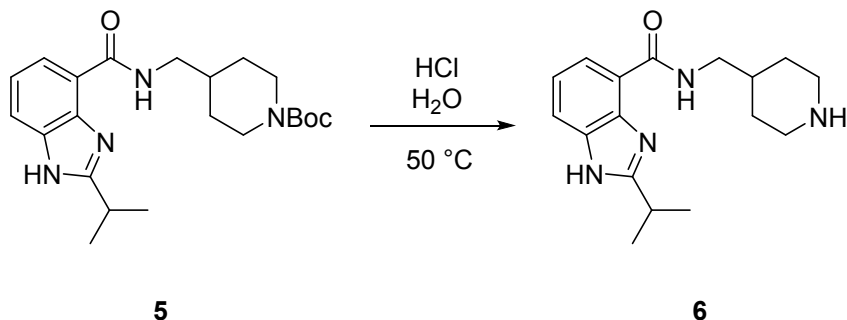

Tert-butyl 4-[[[(2-isopropyl-1h-benzimidazole-4-carbonyl)amino]methyl]piperidine-1-carboxylate **5** (150 g, 356 mmol, 95 mass % potency, 1.00 equiv), water (1400 mL), acetonitrile (74 mL) and hydrochloric acid (4M in water, 266.85 mL, 3.00 equiv) were charged to a reaction vessel. Agitation was initiated and the resulting solution was heated to 50°C. The reaction mixture was stirred at 50°C for 1 hour. A sample of the reaction mixture was then removed and analyzed by HPLC, which indicated complete consumption of Boc-protected starting material **5**. The reaction mixture was cooled to ambient temperature, and the pH of the mixture was adjusted to approximately 11 through the addition of sodium hydroxide (4M in water, 532.9 mmol, 4.5 equiv) via peristaltic pump over 1 hour at ambient temperature. The resulting slurry was equilibrated at room temperature for 12 hours. The slurry was then filtered, and the filter cake was washed twice with water (2 x 150 mL). The isolated solids were dried in a vacuum oven at 45 °C for 12 hours. Piperidine **6** was obtained as an off-white, crystalline solid (98 g, 88% assay corrected yield, 96%

potency).

#### 5.4. sodium hydroxy(1-(methoxycarbonyl)piperidin-4-yl)methanesulfonate (**16**)

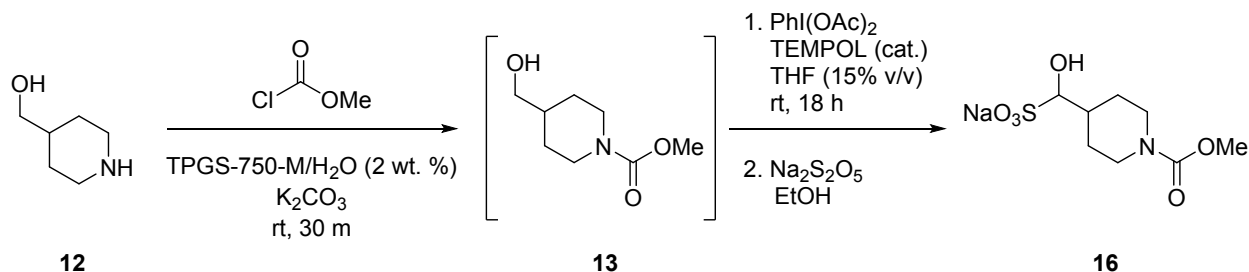

##### *Methyl Carbamate Formation*

4-Piperidylmethanol **12** (1.00 g, 8.68 mmol, 1.00 equiv), potassium carbonate (1.80 g, 13.0 mmol, 1.50 equiv), and TPGS-750-M (2 wt. % in water, 3 mL) were charged to a 250 mL round bottom flask. Methyl chloroformate (0.81 mL, 10.4 mmol, 1.2 equiv) was added slowly via addition funnel while maintaining an internal temperature below 30 °C and controlling the rate of off-gassing. The reaction mixture was then stirred at room temperature for 1 hour. A sample of the mixture was removed and analyzed by GC, which indicated complete consumption of starting material **12**.

##### *Oxidation*

Tetrahydrofuran (1 mL, 10 mmol) was added to the reaction mixture. 4-Hydroxy-tempo (0.075 g, 0.434 mmol, 0.05 equiv) and iodobenzene diacetate (6.15 g, 19.1 mmol, 2.2 equiv) were added sequentially to the reaction mixture. The reaction mixture was then heated to 60 °C and stirred for 24 hours. The reaction mixture was then cooled to room temperature and was polish filtered. The collected salts were discarded.

##### *Aldehyde-Bisulfite Adduct Formation and Isolation*

The filtrate was heated to 60 °C. Sodium metabisulfite (1.16 g, 6.08 mmol, 0.7 equiv) was added at 60 °C, and the mixture was held at 60 °C for 2 hours. Ethanol (16 mL) was added to the mixture at 60 °C over 3 hours via syringe pump. After ethanol addition was complete, the mixture was cooled to ambient temperature and held at ambient temperature for 18 hours, during which time a slurry formed. The solids were collected by filtration, washed with ethanol (2 mL), and dried in a vacuum oven at 45 °C for 18 hours. Aldehyde-bisulfite adduct **16** was obtained as a white, crystalline solid (1.44 g, 37.7% overall assay corrected yield, 75% potency).

#### 5.5. methyl 4-((4-((2-isopropyl-1H-benzo[d]imidazole-4-carboxamido)methyl)piperidin-1-yl)methyl)piperidine-1-carboxylate hydrate (**TAK-954 Hydrate**)

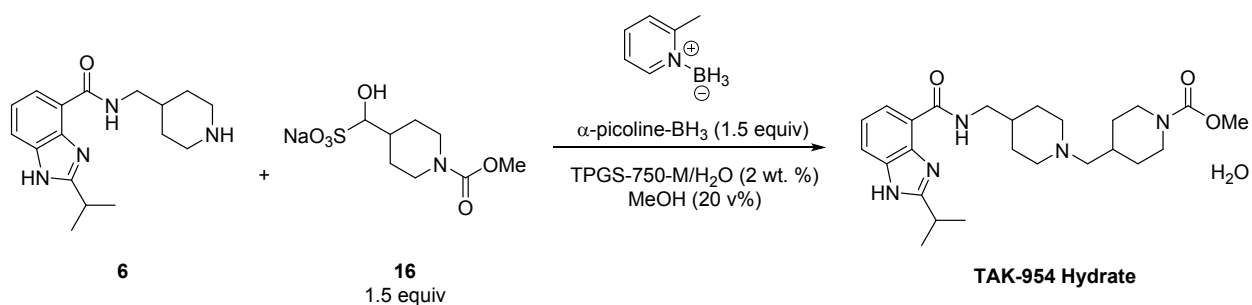

2-Isopropyl-n-(4-piperidylmethyl)-1h-benzimidazole-4-carboxamide **6** (90 g, 288 mmol, 96 mass % potency, 1.00 equiv), [hydroxy-(1-methoxycarbonyl-4-piperidyl)methyl]sulfonyloxysodium **16** (136 g, 431.43 mmol, 87 mass% purity, 1.50 equiv) and  $\alpha$ -picoline borane (46.2 g, 431 mmol, 1.50 equiv) were charged to a reaction vessel. TPGS-750-M (2 wt. % in water, 720 mL) and methanol (180 mL) were added to the vessel. Agitation was initiated and the mixture was heated at 60°C for 12 hours. A sample of the reaction mixture was removed and analyzed by HPLC, which indicated that starting material **6** had been completely consumed. The reaction mixture was cooled to ambient temperature. Sodium hydroxide (1M in water, 520 mL), water (900 mL), and **TAK-954 Hydrate** seed crystals (0.90 g, 1 wt. %) were combined in a separate vessel and stirred at ambient temperature. The reaction mixture was then added to this seeded aqueous hydroxide mixture over 3 hours at ambient temperature via peristaltic pump. The resulting slurry was filtered to collect the solids. The filter cake was washed with water (180 mL) and was dried in a vacuum oven at 45 °C for 12 hours. **TAK-954 Hydrate** was obtained as a white, crystalline solid (130 g, 91% assay corrected yield, 95% potency).

#### 5.6. Recrystallization of methyl 4-((4-((2-isopropyl-1H-benzo[d]imidazole-4-carboxamido) methyl)piperidin-1-yl)methyl)piperidine-1-carboxylate hydrate (**TAK-954 Hydrate**)

**TAK-954 Hydrate** (130 g, 261 mmol, 95 mass % potency, 1.00 equiv) and acetonitrile (1300 mL) were charged to a reaction vessel. The resulting suspension was heated to 82 °C and held at 82 °C until all solids dissolved. The mixture was then cooled to 20 °C over 3 hours, and the resulting slurry was equilibrated at 20 °C for 14 hours. The solids were collected by filtration. The filter cake was washed twice with acetonitrile (2 x 130 mL) and was dried in a vacuum oven at 45 °C for 12 hours. **TAK-954 Anhydrate** was obtained as a white, crystalline solid (115 g, 97% assay corrected yield, 100% potency).

## 6. Process Mass Intensity (PMI) Calculations

$$PMI = \frac{\text{Total Mass of Material Inputs (kg)}}{\text{Mass of Product (kg)}}$$

### 6.1. Preparation of Benzimidazole **11**

|                        | Material                           | Amount (g) |
|------------------------|------------------------------------|------------|
| Limiting Reagent Input | Diaminobenzoic Acid <b>10</b>      | 100.0      |
| Product Output         | Benzimidazole <b>11</b>            | 100.0      |
| Reagents               | Isobutyraldehyde <b>2</b>          | 47.4       |
|                        | NaHSO <sub>3</sub>                 | 164.0      |
| Solvents               | Acetonitrile                       | 157.2      |
| Aqueous                | Water (bisulfite adduct formation) | 875.0      |
|                        | Water (cyclization reaction)       | 500.0      |
|                        | 4M Aqueous NaOH                    | 302.5      |
|                        | 4M Aqueous HCl                     | 108.5      |
|                        | Water (filter cake wash)           | 200.0      |
| Totals                 | All Materials                      | 2454.6     |
|                        | Reagents                           | 211.4      |
|                        | Solvents                           | 157.2      |
|                        | Aqueous                            | 1986.0     |

|                   |      |
|-------------------|------|
| Step PMI          | 24.5 |
| Step PMI Solvents | 1.6  |
| Step PMI Water    | 19.9 |

## 6.2. Preparation of Amide **5**

|                        | Material                 | Amount (g) |
|------------------------|--------------------------|------------|
| Limiting Reagent Input | Benzimidazole <b>11</b>  | 90.0       |
| Product Output         | Amide <b>5</b>           | 169.0      |
| Reagents               | Piperidine <b>4</b>      | 111.0      |
|                        | NMI                      | 114.0      |
|                        | TCFH                     | 166.8      |
| Solvents               | THF                      | 120.0      |
| Aqueous                | Water (reaction)         | 760.0      |
|                        | Water (filter cake wash) | 200.0      |
| Totals                 | All Materials            | 1561.8     |
|                        | Reagents                 | 391.8      |
|                        | Solvents                 | 120.0      |
|                        | Aqueous                  | 960.0      |

|                   |     |
|-------------------|-----|
| Step PMI          | 9.2 |
| Step PMI Solvents | 0.7 |
| Step PMI Water    | 5.7 |

## 6.3. Preparation of Aldehyde-Bisulfite Adduct **16**

|                        | Material                      | Amount (g) |
|------------------------|-------------------------------|------------|
| Limiting Reagent Input | 4-piperidylmethanol <b>12</b> | 1.00       |

|                       |                                     |       |
|-----------------------|-------------------------------------|-------|
| <b>Product Output</b> | Aldehyde-Bisulfite Adduct <b>14</b> | 1.08  |
| <b>Reagents</b>       | K <sub>2</sub> CO <sub>3</sub>      | 1.80  |
|                       | TPGS-750-M                          | 0.06  |
|                       | Methyl Chloroformate                | 0.98  |
|                       | Iodobenzene Diacetate               | 6.15  |
|                       | TEMPOL                              | 0.07  |
|                       | Sodium Metabisulfite                | 1.16  |
| <b>Solvents</b>       | THF                                 | 0.89  |
|                       | EtOH (antisolvent)                  | 12.63 |
|                       | EtOH (filter cake wash)             | 1.60  |
| <b>Aqueous</b>        | Water (reaction)                    | 2.90  |
| <b>Totals</b>         | All Materials                       | 29.24 |
|                       | Reagents                            | 10.22 |
|                       | Solvents                            | 15.12 |
|                       | Aqueous                             | 2.90  |

Step PMI 27.1

Step PMI Solvents 14.0

Step PMI Water 2.7

#### 6.4. Preparation of Amine 6

|                               | <b>Material</b>          | <b>Amount (g)</b> |
|-------------------------------|--------------------------|-------------------|
| <b>Limiting Reagent Input</b> | Amide <b>5</b>           | 150.0             |
| <b>Product Output</b>         | Amine <b>6</b>           | 98.0              |
| <b>Reagents</b>               | N/A                      | 0                 |
| <b>Solvents</b>               | Acetonitrile             | 58.2              |
| <b>Aqueous</b>                | Water (reaction)         | 1400              |
|                               | 4M Aqueous HCl           | 293.6             |
|                               | 4M Aqueous NaOH          | 153.2             |
|                               | Water (filter cake wash) | 300.0             |
| <b>Totals</b>                 | All Materials            | 2355.0            |
|                               | Reagents                 | 0                 |
|                               | Solvents                 | 58.2              |
|                               | Aqueous                  | 2146.8            |

Step PMI 24.0

Step PMI Solvents 0.6

Step PMI Water 21.9

#### 6.5. Preparation of TAK-954 Hydrate

|                               | <b>Material</b>            | <b>Amount (g)</b> |
|-------------------------------|----------------------------|-------------------|
| <b>Limiting Reagent Input</b> | Amine <b>6</b>             | 90.0              |
| <b>Product Output</b>         | TAK-954.H <sub>2</sub> O   | 130.0             |
| <b>Reagents</b>               | Bisulfite Adduct <b>14</b> | 136.0             |

|                 |                           |        |
|-----------------|---------------------------|--------|
|                 | $\alpha$ -Picoline Borane | 46.2   |
|                 | TPGS-750-M                | 14.4   |
|                 | TAK-954 Seed              | 0.90   |
| <b>Solvents</b> | Methanol                  | 180.0  |
| <b>Aqueous</b>  | Water (reaction)          | 705.6  |
|                 | 1M Aqueous NaOH           | 563.2  |
|                 | Water (crystallization)   | 900.0  |
|                 | Water (filter cake wash)  | 180.0  |
| <b>Totals</b>   | All Materials             | 2816.3 |
|                 | Reagents                  | 197.5  |
|                 | Solvents                  | 180    |
|                 | Aqueous                   | 2349   |

|                          |      |
|--------------------------|------|
| <b>Step PMI</b>          | 21.7 |
| <b>Step PMI Solvents</b> | 1.4  |
| <b>Step PMI Water</b>    | 18.1 |

### 6.6. Preparation of **TAK-954**

|                               | <b>Material</b>                 | <b>Amount (g)</b> |
|-------------------------------|---------------------------------|-------------------|
| <b>Limiting Reagent Input</b> | TAK-954.H <sub>2</sub> O        | 130.0             |
| <b>Product Output</b>         | TAK-954                         | 115.0             |
| <b>Reagents</b>               | N/A                             | 0                 |
| <b>Solvents</b>               | Acetonitrile (crystallization)  | 1021.8            |
|                               | Acetonitrile (filter cake wash) | 204.4             |
| <b>Aqueous</b>                | N/A                             | 0                 |
| <b>Totals</b>                 | All Materials                   | 1356.2            |
|                               | Reagents                        | 0                 |
|                               | Solvents                        | 1226.2            |
|                               | Aqueous                         | 0                 |

|                          |      |
|--------------------------|------|
| <b>Step PMI</b>          | 11.8 |
| <b>Step PMI Solvents</b> | 10.7 |
| <b>Step PMI Water</b>    | 0    |

### 6.7. Calculation of Cumulative PMI

| Step | Step Product           | MW     | Yield (%) | Usage Factor (kg)* | Step PMI | Cumulative PMI Contribution | Step PMI Solvents | Cumulative PMI Contribution Solvents | Step PMI Water | Cumulative PMI Contribution Water |
|------|------------------------|--------|-----------|--------------------|----------|-----------------------------|-------------------|--------------------------------------|----------------|-----------------------------------|
| 1    | <b>11</b>              | 204.23 | 79        | 0.634              | 24.5     | 15.5                        | 1.6               | 1.0                                  | 19.9           | 12.6                              |
| 2    | <b>5</b>               | 400.52 | 91        | 1.132              | 9.2      | 10.4                        | 0.7               | 0.8                                  | 5.7            | 6.5                               |
| 3    | <b>6</b>               | 300.41 | 88        | 0.747              | 24.0     | 17.9                        | 0.6               | 0.4                                  | 21.9           | 16.4                              |
| 4    | <b>TAK-954 Hydrate</b> | 473.62 | 91        | 1.072              | 21.7     | 23.3                        | 1.4               | 1.5                                  | 18.1           | 19.4                              |
| 5    | <b>TAK-954</b>         | 455.60 | 97        | 1.000              | 11.8     | 11.8                        | 10.7              | 10.7                                 | 0              | 0                                 |

\* Usage Factor = Amount of Compound in kg Required to Produce 1 kg of TAK-954

|                         |      |
|-------------------------|------|
| Cumulative PMI          | 78.9 |
| Cumulative PMI Solvents | 14.4 |
| Cumulative PMI Water    | 54.9 |

## 7. Compound Characterization Data

### 7.1. [11] 2-isopropyl-1H-benzo[d]imidazole-4-carboxylic acid

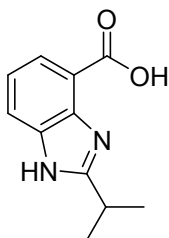

**11**

**Appearance** off-white solid

**Melting Point** 127°C-133°C

**IR**  $\nu_{\max}/\text{cm}^{-1}$  3427 (OH), 2978 (NH), 1709 (CO)

**$^1\text{H}$  NMR** (400 MHz, DMSO- $d_6$ )  $\delta$  7.85 (dd,  $J$  = 8.0, 1.0 Hz, 1H), 7.81 (dd,  $J$  = 7.6, 1.0 Hz, 1H), 7.32 (t,  $J$  = 7.8, 1H), 3.42 (hept,  $J$  = 6.9 Hz, 1H), 1.37 (d,  $J$  = 6.9 Hz, 6H).

**$^{13}\text{C}$  NMR** (100 MHz, DMSO- $d_6$ )  $\delta$  166.6, 161.7, 140.3, 133.5, 124.4, 121.8, 121.6, 115.3, 27.5, 21.2.

**HRMS**  $\text{C}_{11}\text{H}_{12}\text{N}_2\text{O}_2$  TOF MS ES+ calcd: 205.0899; found: 205.0990

### 7.2. [5] *tert*-butyl 4-((2-isopropyl-1H-benzo[d]imidazole-4-carboxamido)methyl)piperidine-1-carboxylate:

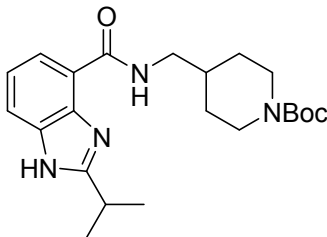

**5**

**Appearance** off-white solid

**IR**  $\nu_{\text{max}}/\text{cm}^{-1}$  3413 (NH), 3185 (NH), 1694 (CO), 1636 (CO)

**Melting Point** 175°C-180°C

**$^1\text{H}$  NMR** (400 MHz,  $\text{CDCl}_3$ )  $\delta$  7.96 (d,  $J = 7.6$  Hz, 1H), 7.67 (d,  $J = 7.9$  Hz, 1H), 7.25 (t,  $J = 7.2$  Hz, 1H), 4.12 (brs, 2H), 3.47 (brs, 2H), 3.38 (hept,  $J = 7.0$  Hz, 1H), 2.72 (t,  $J = 10.2$  Hz, 2H), 1.83 (m, 3H), 1.51 (d,  $J = 7.0$  Hz, 6H), 1.45 (s, 9H); 1.27 (qd,  $J = 12.5, 4.3$  Hz, 2H).

**$^{13}\text{C}$  NMR** (100 MHz,  $\text{CDCl}_3$ )  $\delta$  166.3, 160.2, 155.0, 140.5, 134.9, 123.1, 122.9, 120.8, 116.4, 79.6, 45.2, 43.9, 36.7, 30.1, 28.7, 28.6, 21.3.

**HRMS**  $\text{C}_{22}\text{H}_{32}\text{N}_4\text{O}_3$  TOF MS ES+ calcd: 401.2474; found: 401.2527

7.3. [6] 2-isopropyl-N-(piperidin-4-ylmethyl)-1H-benzo[d]imidazole-4-carboxamide

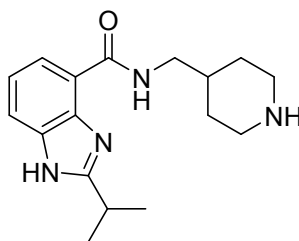

6

**Appearance** off-white solid

**IR**  $\nu_{\text{max}}/\text{cm}^{-1}$  3431 (NH), 3254 (NH), 3097 (NH), 1647 (CO)

**Melting Point** 200°C-205°C

**$^1\text{H}$  NMR** (400 MHz,  $\text{CDCl}_3$ ) A mixture of two rotamers, with a ratio of 3.4:1. Major Rotamer:  $\delta$  10.28 (brs, 1H), 8.09 (d,  $J = 7.6$  Hz, 1H), 7.51 (d,  $J = 7.9$  Hz, 1H), 7.28 (t,  $J = 7.2$  Hz, 1H), 3.70 (s, 3H), 3.52 (m, 2H), 3.26 (hept,  $J = 6.9$  Hz, 1H), 3.16 (dt,  $J = 12.6, 3.2$  Hz, 2H), 2.66 (m, 1H), 1.87 (m, 3H), 1.46 (d,  $J = 6.9$  Hz, 6H), 1.35 (m, 2H).

**$^{13}\text{C}$  NMR** (100 MHz,  $\text{CDCl}_3$ ) A mixture of two rotamers, with a ratio of 3.4:1. Major Rotamer:  $\delta$  166.3, 160.3, 141.1, 134.1, 123.2, 122.6, 122.3, 114.0, 46.4, 45.5, 36.9, 31.3, 29.0, 21.4.

**HRMS**  $\text{C}_{17}\text{H}_{24}\text{N}_4\text{O}$  TOF MS ES+ calcd: 301.1950; found: 301.2037

7.4. [16] sodium hydroxy(1-(methoxycarbonyl)piperidin-4-yl)methanesulfonate



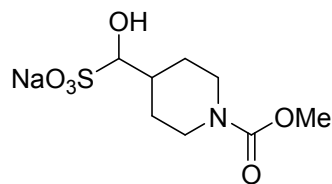

**16**

**Appearance** white solid

**IR**  $\nu_{\max}/\text{cm}^{-1}$  3508 (OH), 1686 (CO)

**$^1\text{H}$  NMR** (400 MHz,  $\text{D}_2\text{O}$ ) A mixture of two rotamers, with a ratio of 1:1. Rotamer 1:  $\delta$  4.27 (d,  $J = 5.5$  Hz, 1H), 4.11 (d,  $J = 12.8$  Hz, 2H), 3.70 (s, 3H), 2.89 (d,  $J = 12.0$  Hz, 2H), 2.11 (m, 1H), 1.99 (d,  $J = 13.3$  Hz, 2H), 1.38 (m, 2H). Rotamer 2:  $\delta$  4.27 (d,  $J = 5.5$  Hz, 1H), 4.11 (d,  $J = 12.8$  Hz, 2H), 3.70 (s, 3H), 2.89 (d,  $J = 12.0$  Hz, 2H), 2.11 (m, 1H), 1.87 (d,  $J = 13.3$  Hz, 2H), 1.47 (m, 2H).

**$^{13}\text{C}$  NMR** (100 MHz,  $\text{D}_2\text{O}$ ) A mixture of two rotamers, with a ratio of 1:1. Rotamer 1:  $\delta$  86.8, 52.9, 43.7, 37.6, 28.6. Rotamer 2:  $\delta$  86.8, 52.9, 43.6, 37.6, 26.0

**HRMS**  $\text{C}_8\text{H}_{14}\text{NNaO}_6\text{S}$  TOF MS ES+ calcd: 276.0440; found: 276.0473

7.5. [**TAK-954**] methyl 4-((4-((2-isopropyl-1H-benzo[d]imidazole-4-carboxamido)methyl)piperidin-1-yl)methyl)piperidine-1-carboxylate

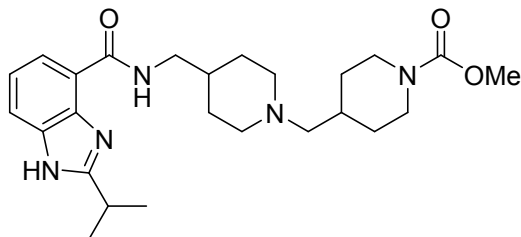

**TAK-954**

**Appearance** white solid

**IR**  $\nu_{\max}/\text{cm}^{-1}$  3300 (NH), 3125 (NH), 1697 (CO), 1641 (CO)

**Melting Point** 145°C-150°C

**$^1\text{H}$  NMR** (400 MHz,  $\text{CDCl}_3$ ) A mixture of two rotamers, with a ratio of 5:1. Major Rotamer:  $\delta$  10.26 (brs, 1H), 8.06 (d,  $J = 7.6$  Hz, 1H), 7.52 (d,  $J = 7.8$  Hz, 1H), 7.26 (t,  $J = 7.2$  Hz, 1H), 4.12 (brs, 2H), 3.68 (s, 3H), 3.50 (m, 2H), 3.25 (hept,  $J = 6.9$  Hz, 1H), 2.99 (brs, 2H), 2.75 (t,  $J = 12.8$  Hz, 2H), 2.25 (m, 2H), 2.02 (m, 2H), 1.82 (m, 8H), 1.46 (d,  $J = 7.0$  Hz, 6H), 1.12 (m, 2H).

**$^{13}\text{C}$  NMR** (100 MHz,  $\text{CDCl}_3$ )  $\delta$  166.4, 164.5\*, 160.4, 161.9\*, 156.1, 141.1, 139.5\*, 134.0, 126.7\*, 125.5\*, 123.2, 122.5, 122.3, 118.8\*, 114.8\*, 114.1, 64.7, 54.1, 52.7, 45.0, 43.9, 35.8, 33.2, 31.0, 29.0, 28.4, 22.2, 21.5. (\* signals from minor rotamer)

**HRMS**  $\text{C}_{25}\text{H}_{37}\text{N}_5\text{O}_3$  TOF MS ES+ calcd: 456.2896; found: 456.2962

## 8. NMR Spectra

### 8.1. 2-isopropyl-1H-benzo[d]imidazole-4-carboxylic acid

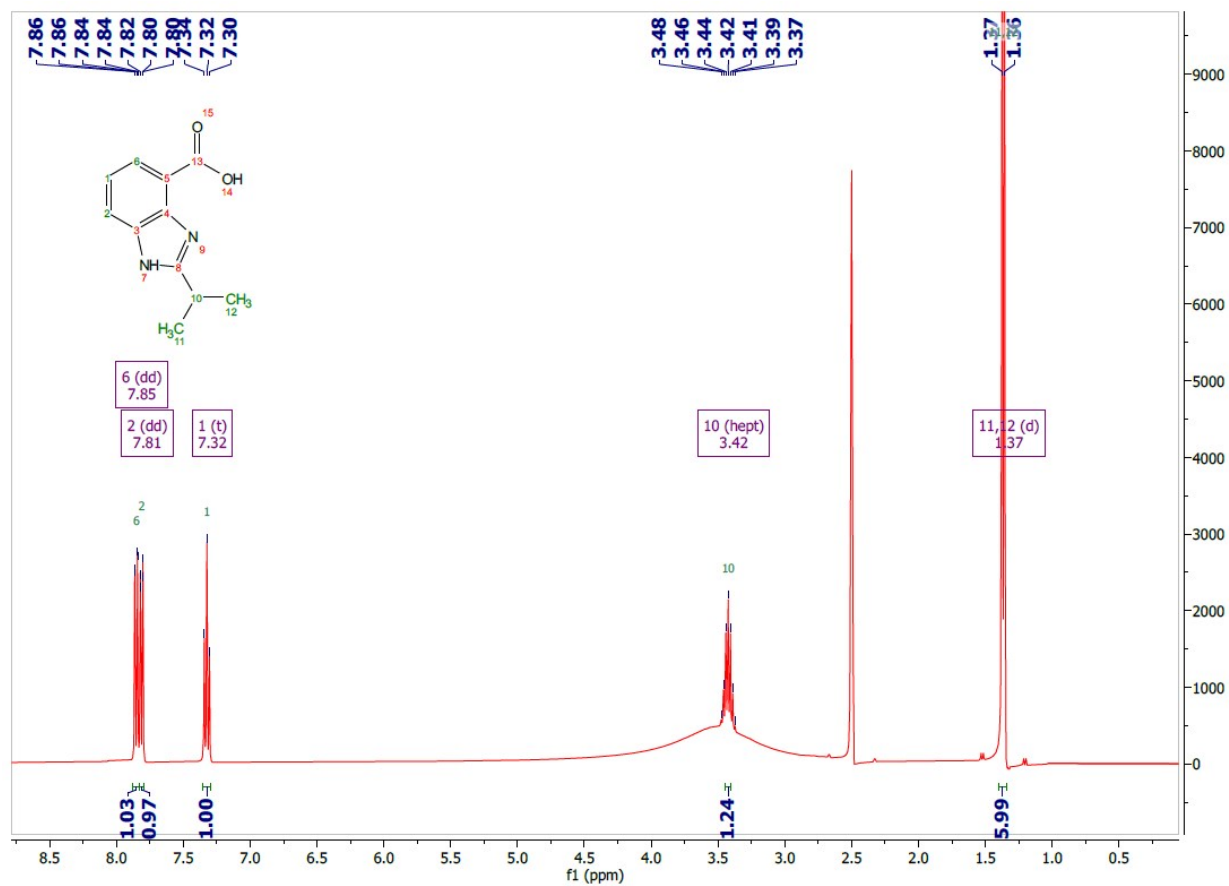

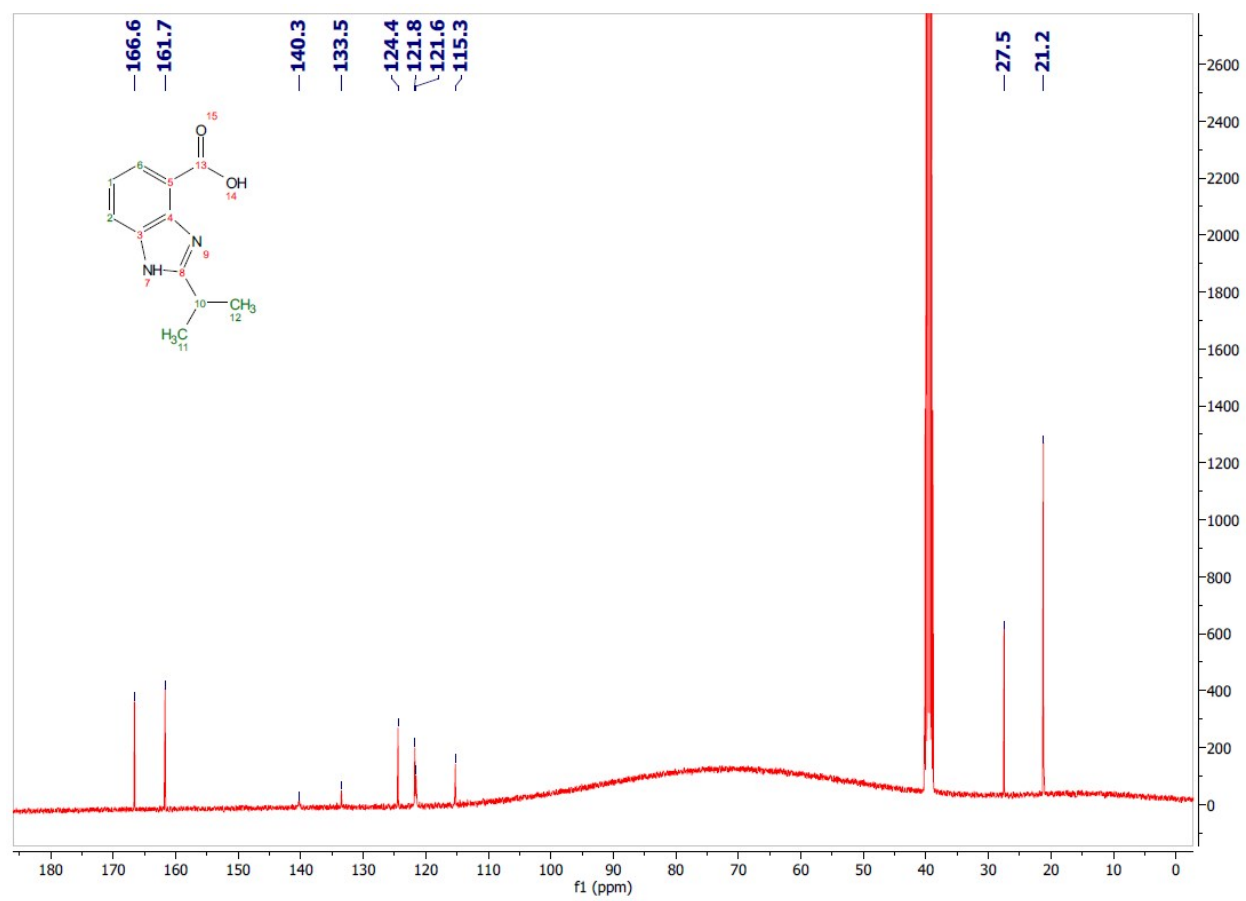

8.2. *tert*-butyl 4-((2-isopropyl-1*H*-benzo[*d*]imidazole-4-carboxamido) methyl) piperidine-1-carboxylate

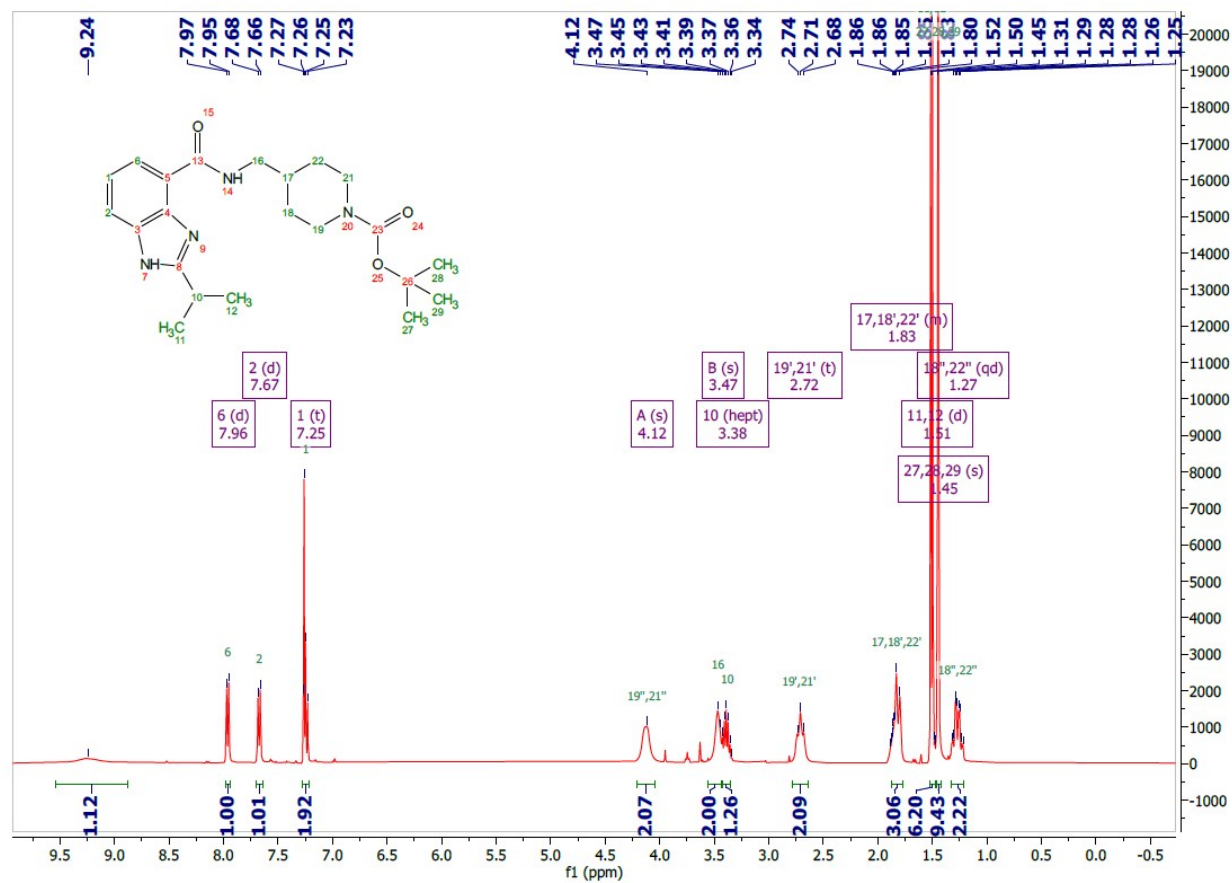

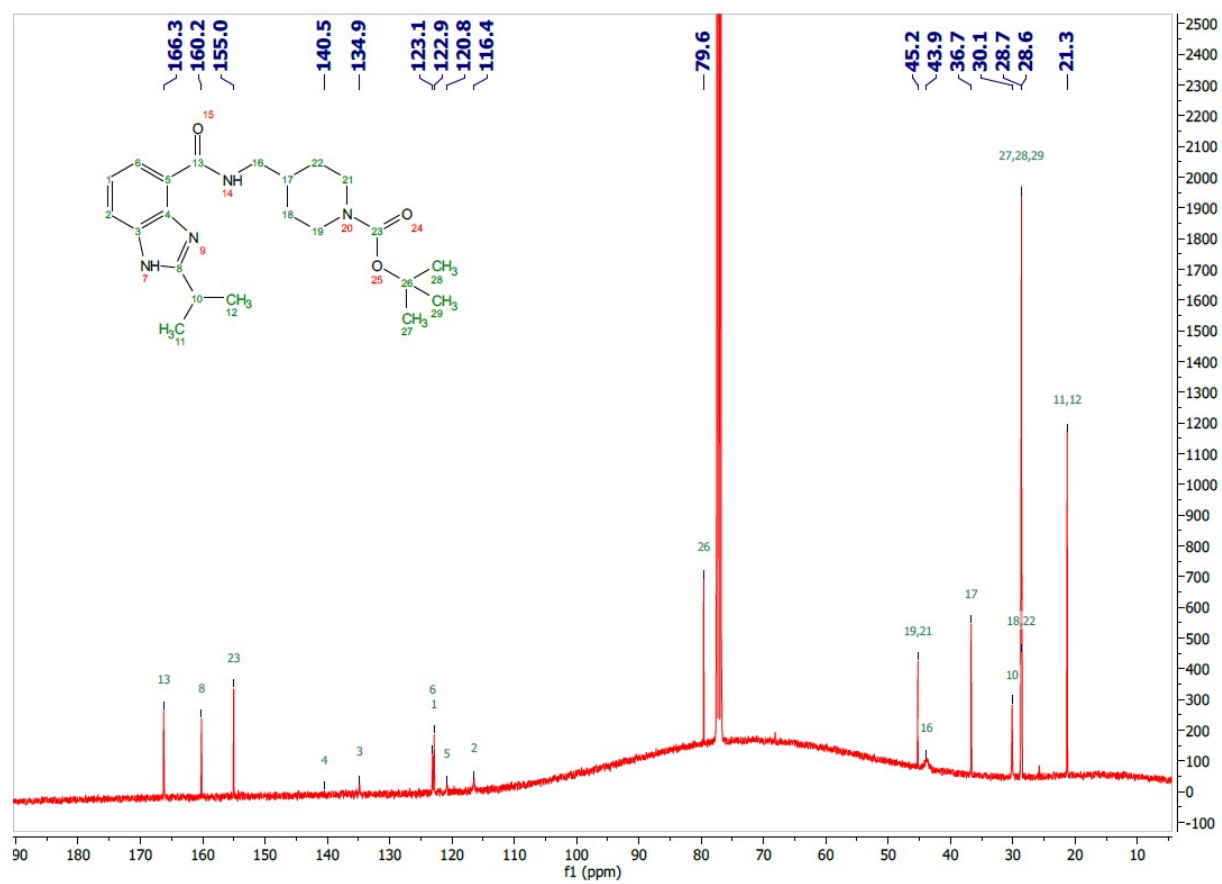

### 8.3. 2-isopropyl-N-(piperidin-4-ylmethyl)-1H-benzo[d]imidazole-4-carboxamide

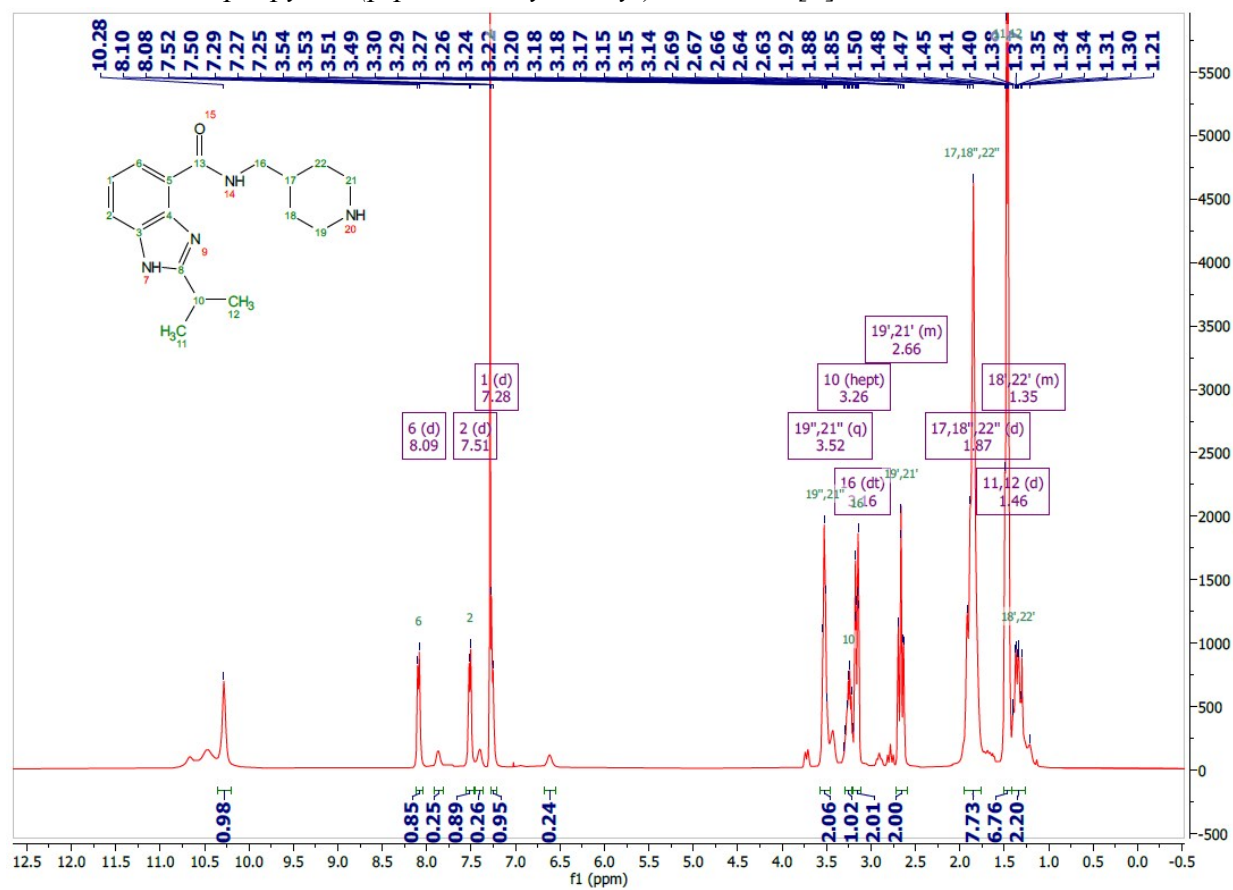

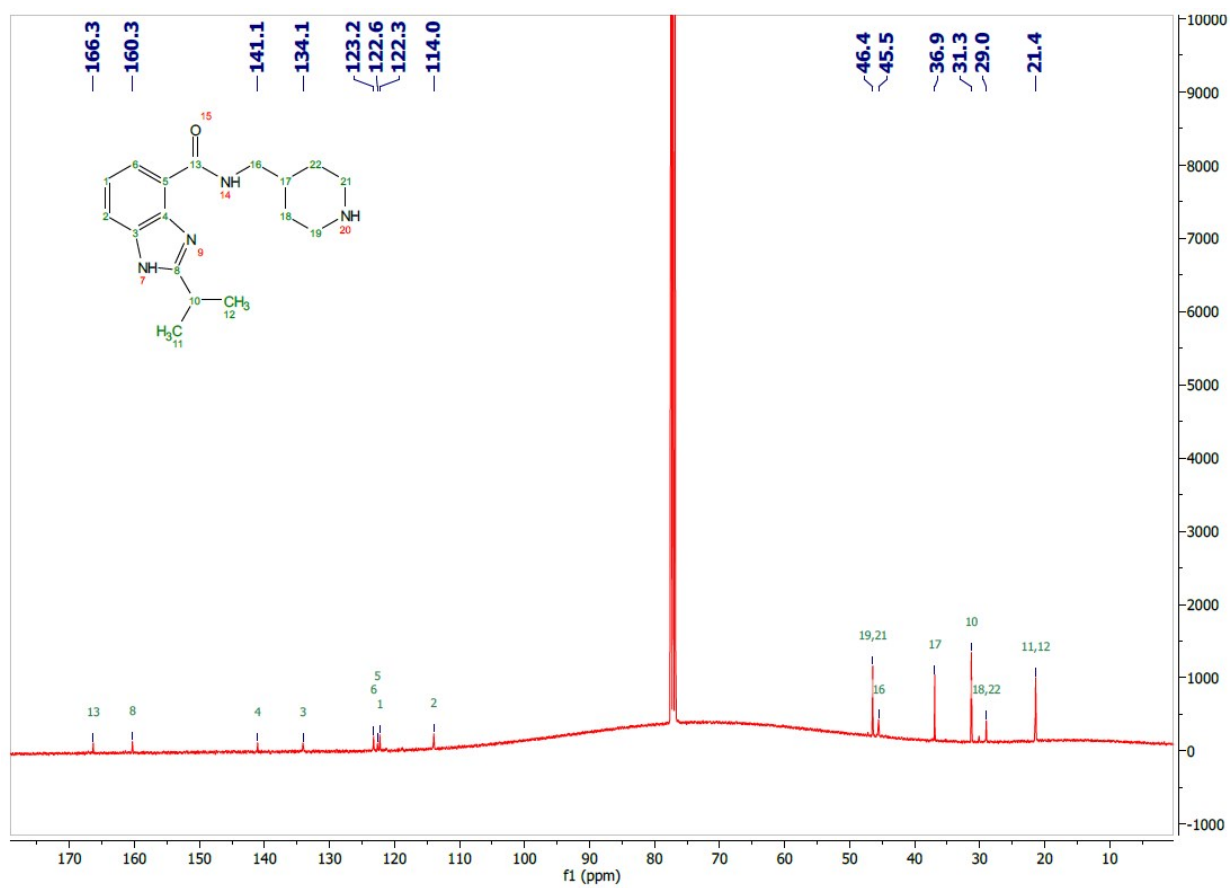



8.4. sodium hydroxy(1-(methoxycarbonyl)piperidin-4-yl)methanesulfonate

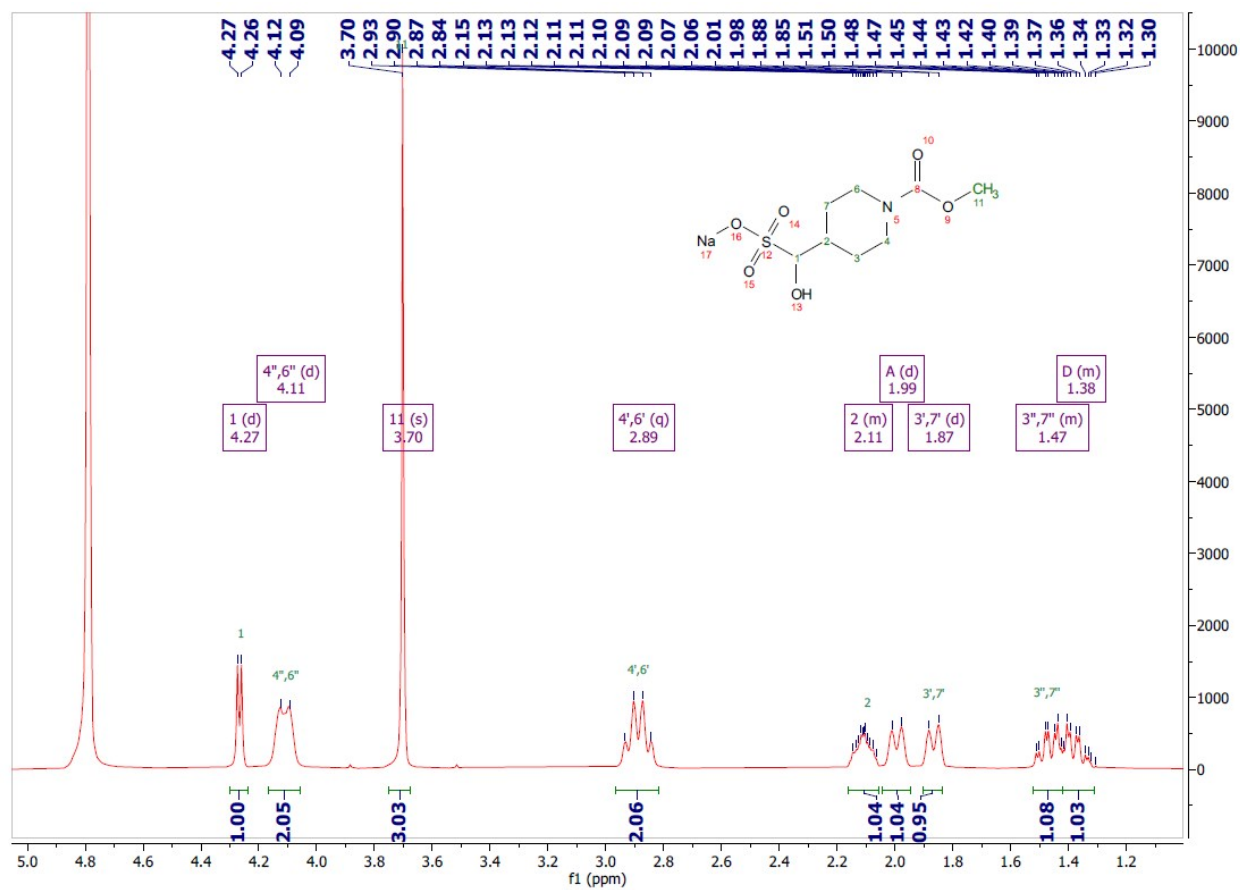

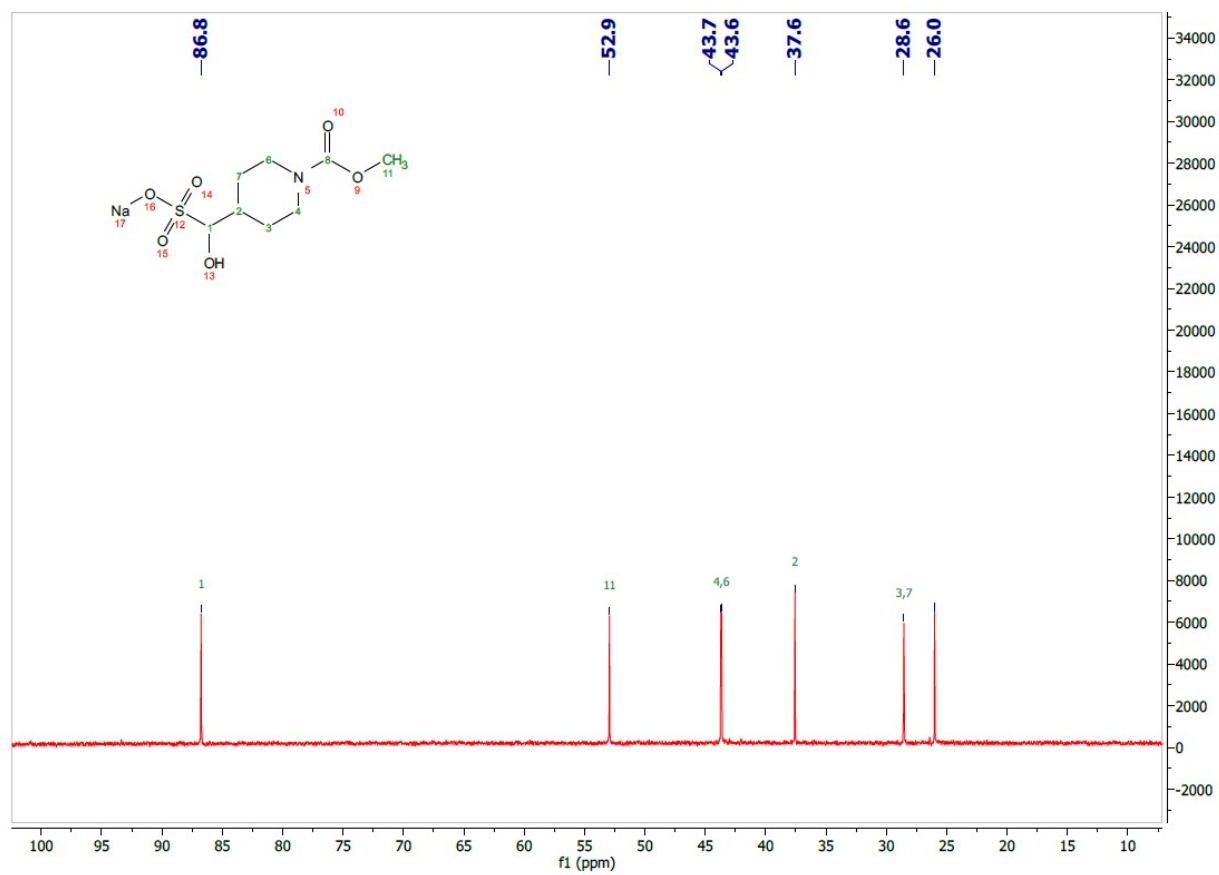

8.5. methyl 4-((4-((2-isopropyl-1H-benzo[d]imidazole-4-carboxamido)methyl)piperidin-1-yl)methyl)piperidine-1-carboxylate

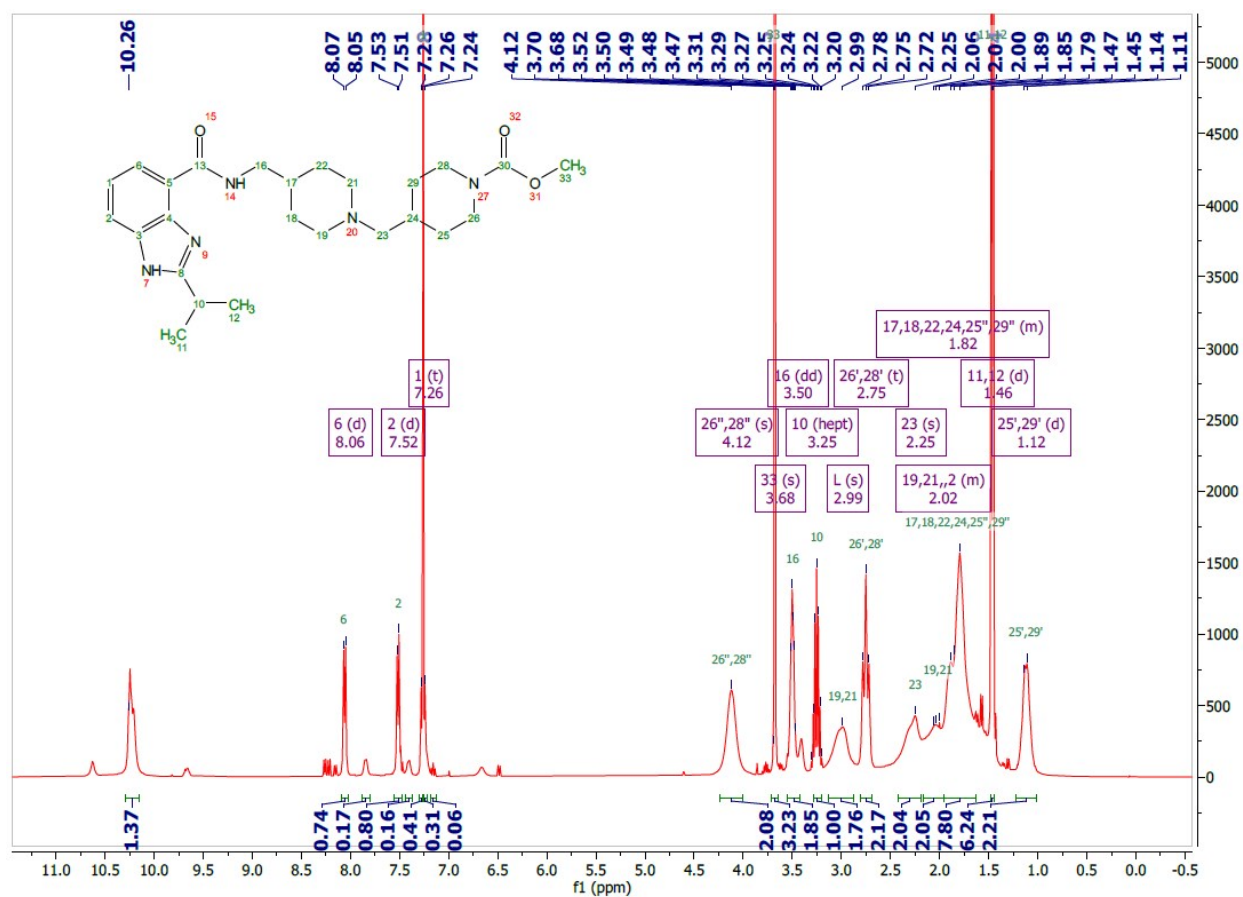

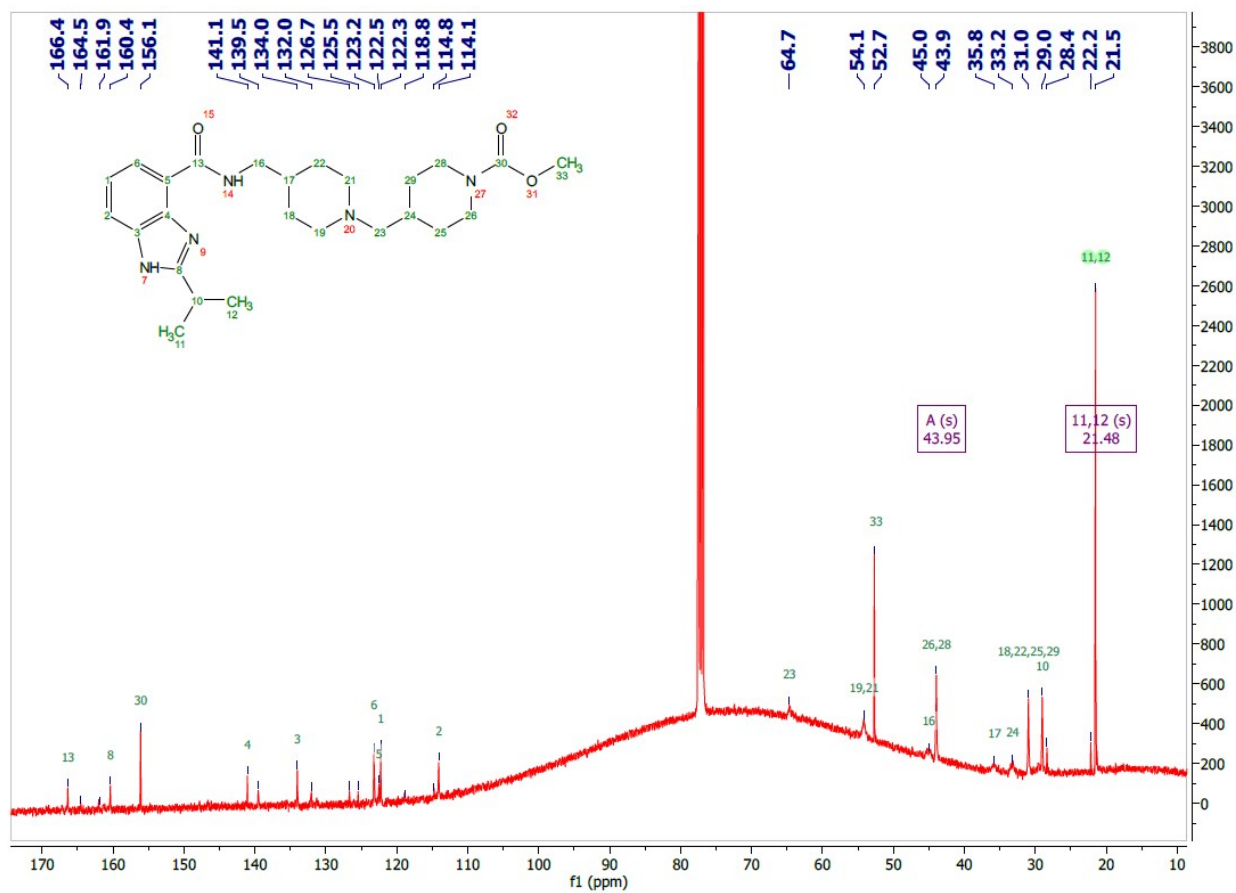

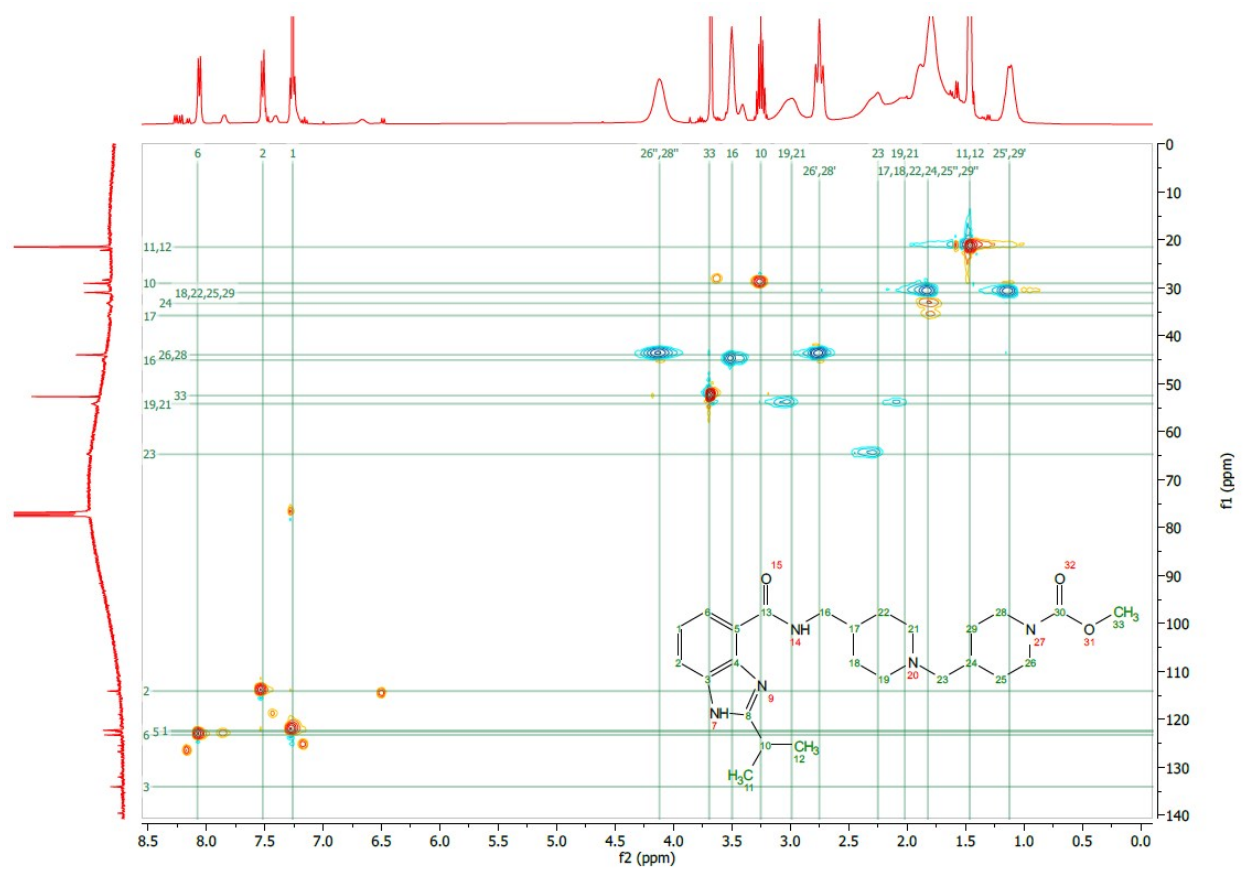

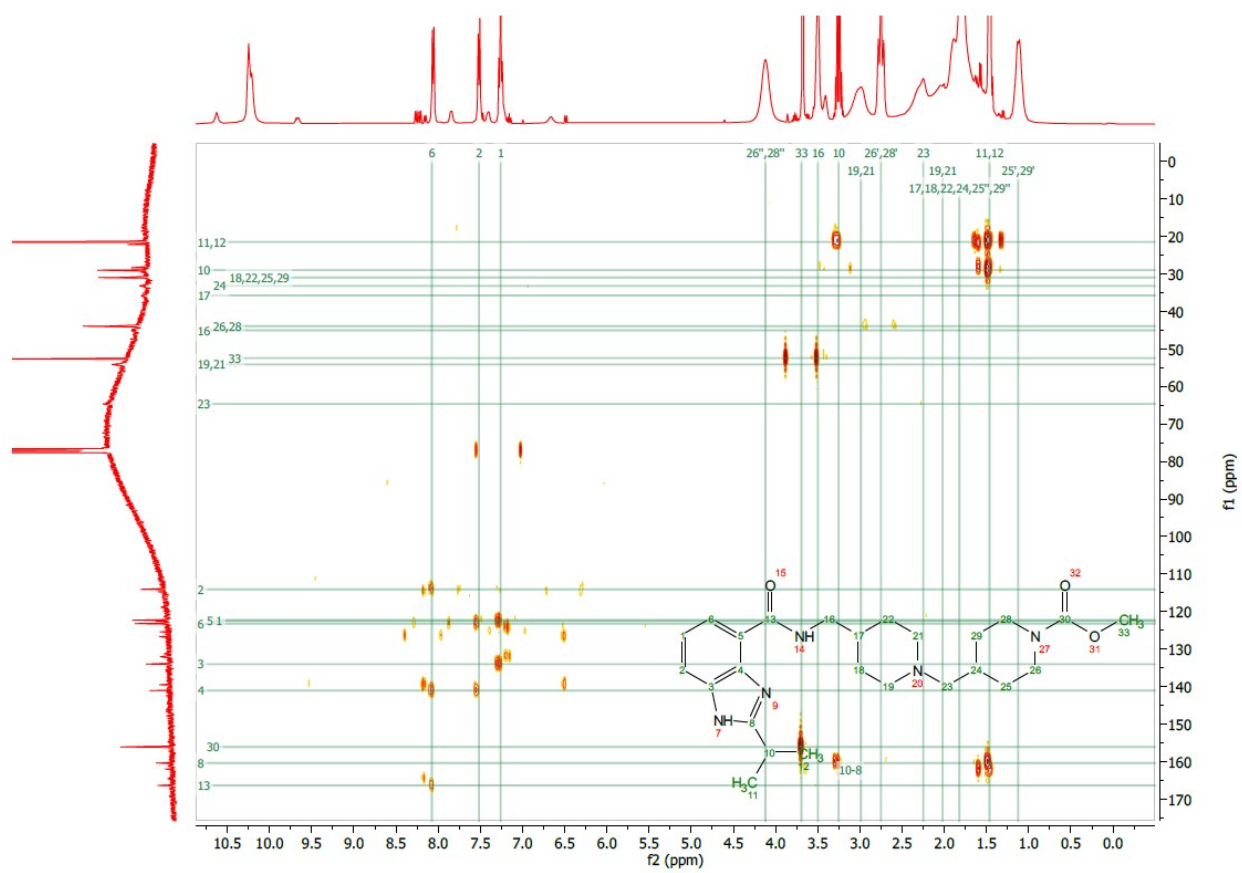

Supplement: d0gc03316b1.pdf [file d0gc03316b1.pdf]
